# Supplementary material
Source: MDPI journal article supplement (https://www.mdpi.com/2225-1154/11/9/180)
Supplement: s1 [file s1]

## Supplementary material

### Tables

**Table S1.** Missing data for each station and meteorological parameter. X = absence of meteorological data. “Produced by the authors”.

| COUNTRY | STATION      | ≥10 days gap |                                                         |            |                                 |
|---------|--------------|--------------|---------------------------------------------------------|------------|---------------------------------|
|         |              | TMAX         | TMIN                                                    | PREC       | QQ                              |
| SPAIN   | MALAGA       | -            | -                                                       | -          | 06-08/87                        |
|         | GRANADA      | -            | -                                                       | -          | 12/85, 01-02/86                 |
|         | MELILLA      | -            | -                                                       | -          | -                               |
|         | LLEIDA       | -            | -                                                       | -          | -                               |
| FRANCE  | PERPIGNAN    | -            | -                                                       | -          | 09/2019                         |
|         | MONTPELLIER  | -            | -                                                       | -          | X                               |
|         | MARSEILLES   | -            | -                                                       | -          | 09/2019                         |
|         | NICE         | -            | -                                                       | -          | 12/90, 01-02/91                 |
| ITALY   | CAGLIARI     | -            | 09-12/13, 01-02/14, 11/14,<br>01/15, 09-12/15, 01-02/16 | -          | X                               |
|         | BRINDISI     | -            | -                                                       | 03-09/2004 | -                               |
| GREECE  | LARISA       | -            | -                                                       | -          | X                               |
|         | THESSALONIKI | 01-03/82     | 01-03/82                                                | -          | 01-12/82, 08/84, 09-<br>11/2006 |
| CYPRUS  | LARNACA      | -            | -                                                       | -          | X                               |

**Table S2.** Latitude (°), longitude (°), and altitude (m) of observations (OBS) and grid products (AGRI4CAST, EOBS-0.1 and EOBS-0.25). “Produced by the authors”.

| COUNTRY | STATION      | OBS              |              | AGRI4CAST        |              | EOBS-0.1         |              | EOBS-0.25        |              |
|---------|--------------|------------------|--------------|------------------|--------------|------------------|--------------|------------------|--------------|
|         |              | Lat-Lon          | ALTITUDE (m) |
| SPAIN   | MALAGA       | 36.66°N, -4.48°W | 7            | 36.63°N, -4.61°W | 69           | 36.74°N, -4.45°W | 192          | 36.62°N, -4.62°W | 259          |
|         | GRANADA      | 37.18°N, -3.78°W | 567          | 37.17°N, -3.86°W | 765          | 37.14°N, -3.75°W | 679          | 37.12°N, -3.87°W | 789          |
|         | MELILLA      | 35.27°N, -2.95°W | 47           | 35.22°N, -2.98°W | 250          | 35.24°N, -2.95°W | 223          | 35.12°N, -2.87°W | 187          |
|         | LLEIDA       | 41.62°N, 0.59°E  | 192          | 41.60°N, 0.61°E  | 193          | 41.64°N, 0.54°E  | 223          | 41.62°N, 0.62°E  | 204          |
| FRANCE  | PERPIGNAN    | 42.73°N, 2.87°E  | 42           | 42.69°N, 2.88°E  | 11           | 42.74°N, 2.84°E  | 45           | 42.62°N, 2.87°E  | 98           |
|         | MONTPELLIER  | 43.57°N, 3.96°E  | 2            | 43.56°N, 4.10°E  | 1            | 43.54°N, 3.94°E  | 5            | 43.62°N, 3.87°E  | 63           |
|         | MARSEILLES   | 43.43°N, 5.21°E  | 9            | 43.36°N, 5.02°E  | 14           | 43.44°N, 5.24°E  | 97           | 43.37°N, 5.12°E  | 56           |
|         | NICE         | 43.64°N, 7.20°E  | 2            | 43.62°N, 7.06°E  | 69           | 43.64°N, 9.86°E  | 57           | 43.62°N, 7.12°E  | 213          |
| ITALY   | CAGLIARI     | 39.23°N, 9.05°E  | 21           | 39.32°N, 9.03°E  | 39           | 39.24°N, 9.04°E  | 15           | 39.37°N, 9.12°E  | 186          |
|         | BRINDISI     | 40.63°N, 17.93°E | 10           | 40.58°N, 17.84°E | 25           | 40.64°N, 17.94°E | 16           | 37.62°N, -3.12°E | 41           |
| GREECE  | LARISA       | 39.65°N, 22.45°E | 73           | 39.66°N, 22.42°E | 100          | 39.64°N, 22.44°E | 76           | 39.62°N, 22.37°E | 136          |
|         | THESSALONIKI | 40.52°N, 22.97°E | 7            | 40.50°N, 22.93°E | 110          | 40.44°N, 22.94°E | 97           | 40.62°N, 22.87°E | 89           |
| CYPRUS  | LARNACA      | 34.88°N, 33.63°E | 1            | 34.97°N, 33.58°E | 105          | 34.84°N, 33.54°E | 61           | 34.87°N, 33.37°E | 259          |

**Table S3.** Genetic coefficients for Iride variety (Mereu et al., 2019).

| Coefficient                                                           | Value |
|-----------------------------------------------------------------------|-------|
| P1D (Photoperiod response (% reduction in rate/10 h drop in pp))      | 62    |
| P1V (Days,optimum vernalizing temperature,required for vernalization) | 25    |
| P5 (Grain filling (excluding lag) phase duration (oC.d))              | 777   |
| G1 (Kernel number per unit canopy weight at anthesis (#/g))           | 29    |
| G2 (Standard kernel size under optimum conditions (mg))               | 41    |
| G3 (Standard,non-stressed mature tiller wt (incl grain) (g dwt))      | 2     |
| PHINT (Interval between successive leaf tip appearances (oC.d))       | 97    |

**Table S4.** Scale of correlation coefficient and interpretation of its calculated values (Hinkle et al. 1994).

| Scale of correlation coefficient | Value                 |
|----------------------------------|-----------------------|
| $0 < r \leq 0.19$                | Very Low Correlation  |
| $0.2 \leq r \leq 0.39$           | Low Correlation       |
| $0.4 \leq r \leq 0.59$           | Moderate Correlation  |
| $0.6 \leq r \leq 0.79$           | High Correlation      |
| $0.8 \leq r \leq 1.0$            | Very High Correlation |

**Table S5.** Discrepancies of simulated with CERES-Wheat anthesis, maturity (expressed as Gridded (G) –Measured (M)) and harvested yield ((G–M)/M)× 100 (%) for the reference period. “Produced by the authors”.

| Anthesis (days)          |               |      |     |      |      |      |             |      |     |      |     |      |              |      |     |      |      |      |
|--------------------------|---------------|------|-----|------|------|------|-------------|------|-----|------|-----|------|--------------|------|-----|------|------|------|
|                          | AGRI4CAST-OBS |      |     |      |      |      | EOBS0.1-OBS |      |     |      |     |      | EOBS0.25-OBS |      |     |      |      |      |
| STATION                  | N             | Mean | Std | Q25  | Q50  | Q75  | N           | Mean | Std | Q25  | Q50 | Q75  | N            | Mean | Std | Q25  | Q50  | Q75  |
| MALAGA AEROPUERTO, SP    | 40            | 1,0  | 1,8 | 0,0  | 1,0  | 2,0  | 40          | 7,1  | 4,4 | 4,0  | 7,0 | 11,0 | 40           | 10,9 | 5,0 | 8,0  | 11,0 | 14,5 |
| GRANADA AEROPUERTO, SP   | 39            | 20,1 | 3,6 | 18,5 | 20,0 | 22,0 | 39          | 8,9  | 2,1 | 7,5  | 9,0 | 11,0 | 39           | 19,7 | 4,6 | 16,0 | 19,0 | 23,5 |
| MELILLA, SP              | 40            | 2,5  | 4,9 | -1,0 | 3,0  | 6,0  | 40          | 0,0  | 3,3 | -2,5 | 1,0 | 2,0  | 40           | -0,8 | 2,3 | -2,5 | 0,0  | 0,0  |
| LLEIDA, SP               | 29            | -1,9 | 3,4 | -3,3 | -2,0 | -0,8 | 29          | 3,5  | 1,2 | 3,0  | 3,0 | 4,0  | 29           | 0,8  | 1,1 | 0,0  | 0,5  | 2,0  |
| PERPIGNAN, FR            | 39            | -3,4 | 1,1 | -4,0 | -3,0 | -3,0 | 39          | 0,8  | 0,6 | 0,5  | 1,0 | 1,0  | 39           | 3,9  | 1,5 | 3,0  | 4,0  | 5,0  |
| MARSEILLES MARIGNANE, FR | 39            | -1,8 | 1,9 | -3,0 | -1,0 | -0,5 | 39          | 8,4  | 1,4 | 7,0  | 8,0 | 9,0  | 39           | 3,1  | 1,1 | 2,0  | 3,0  | 4,0  |
| NICE, FR                 | 36            | 4,9  | 1,2 | 4,0  | 5,0  | 6,0  | 36          | 5,2  | 1,8 | 4,0  | 5,0 | 6,0  | 36           | 19,6 | 5,0 | 17,0 | 18,0 | 22,0 |
| BRINDISI, IT             | 38            | 0,5  | 1,0 | 0,0  | 1,0  | 1,0  | 38          | 0,0  | 0,3 | 0,0  | 0,0 | 0,0  | 38           | 0,0  | 0,8 | 0,0  | 0,0  | 1,0  |
| THESSALONIKI, GR         | 28            | 15,0 | 2,8 | 13,8 | 15,0 | 16,3 | 28          | 8,9  | 2,3 | 7,0  | 8,0 | 11,0 | 28           | 8,9  | 2,5 | 7,0  | 8,0  | 10,3 |
| AVERAGE                  | 9             | 4,1  | 8,1 | -1,8 | 1,0  | 4,9  | 9           | 4,7  | 3,8 | 0,8  | 5,2 | 8,4  | 9            | 7,3  | 8,0 | 0,8  | 3,9  | 10,9 |

| Maturity (days)          |               |      |     |      |      |      |             |      |     |     |      |      |              |      |     |      |      |      |
|--------------------------|---------------|------|-----|------|------|------|-------------|------|-----|-----|------|------|--------------|------|-----|------|------|------|
|                          | AGRI4CAST-OBS |      |     |      |      |      | EOBS0.1-OBS |      |     |     |      |      | EOBS0.25-OBS |      |     |      |      |      |
| STATION                  | N             | Mean | Std | Q25  | Q50  | Q75  | N           | Mean | Std | Q25 | Q50  | Q75  | N            | Mean | Std | Q25  | Q50  | Q75  |
| MALAGA AEROPUERTO, SP    | 40            | 2,6  | 1,6 | 1,5  | 3,0  | 4,0  | 40          | 10,9 | 3,4 | 8,0 | 11,0 | 14,0 | 40           | 15,7 | 3,7 | 13,0 | 16,0 | 18,0 |
| GRANADA AEROPUERTO, SP   | 39            | 18,6 | 2,3 | 17,5 | 19,0 | 20,0 | 39          | 8,5  | 1,7 | 8,0 | 8,0  | 10,0 | 39           | 18,0 | 3,1 | 16,0 | 19,0 | 20,0 |
| MELILLA, SP              | 40            | 9,0  | 4,0 | 6,5  | 10,0 | 11,5 | 40          | 5,3  | 2,9 | 3,0 | 6,0  | 6,5  | 40           | 3,1  | 2,1 | 1,0  | 3,0  | 4,0  |
| LLEIDA, SP               | 29            | -1,1 | 3,1 | -2,3 | -2,0 | 0,0  | 29          | 3,4  | 0,9 | 3,0 | 3,0  | 4,0  | 29           | 1,5  | 0,7 | 1,0  | 1,0  | 2,0  |
| PERPIGNAN, FR            | 39            | -3,3 | 0,7 | -4,0 | -3,0 | -3,0 | 39          | 0,9  | 0,4 | 1,0 | 1,0  | 1,0  | 39           | 4,6  | 1,4 | 4,0  | 4,0  | 5,0  |
| MARSEILLES MARIGNANE, FR | 39            | -1,0 | 1,9 | -2,0 | -1,0 | 0,0  | 39          | 8,4  | 1,2 | 7,5 | 8,0  | 9,0  | 39           | 4,1  | 1,0 | 3,0  | 4,0  | 5,0  |
| NICE, FR                 | 36            | 5,2  | 1,3 | 4,0  | 5,0  | 6,0  | 36          | 5,0  | 1,3 | 4,0 | 5,0  | 6,0  | 36           | 18,7 | 3,7 | 16,0 | 18,0 | 20,0 |
| BRINDISI, IT             | 38            | 0,8  | 0,9 | 0,0  | 1,0  | 2,0  | 38          | 0,0  | 0,2 | 0,0 | 0,0  | 0,0  | 38           | 1,1  | 0,7 | 1,0  | 1,0  | 1,0  |
| THESSALONIKI, GR         | 28            | 13,8 | 2,7 | 12,8 | 14,0 | 15,3 | 28          | 8,7  | 1,9 | 7,0 | 9,0  | 10,0 | 28           | 8,3  | 1,9 | 7,0  | 8,0  | 9,0  |
| AVERAGE                  | 9             | 4,9  | 7,5 | -1,0 | 2,6  | 9,0  | 9           | 5,7  | 3,7 | 3,4 | 5,3  | 8,5  | 9            | 8,3  | 7,2 | 3,1  | 4,6  | 15,7 |

| Harvesting (%)           |               |      |      |      |      |      |             |      |      |      |      |      |              |      |      |      |      |      |
|--------------------------|---------------|------|------|------|------|------|-------------|------|------|------|------|------|--------------|------|------|------|------|------|
|                          | AGRI4CAST-OBS |      |      |      |      |      | EOBS0.1-OBS |      |      |      |      |      | EOBS0.25-OBS |      |      |      |      |      |
| STATION                  | N             | Mean | Std  | Q25  | Q50  | Q75  | N           | Mean | Std  | Q25  | Q50  | Q75  | N            | Mean | Std  | Q25  | Q50  | Q75  |
| MALAGA AEROPUERTO, SP    | 40            | 3,2  | 4,2  | 1,0  | 2,2  | 5,1  | 40          | 10,8 | 6,2  | 6,2  | 10,4 | 15,0 | 40           | 15,2 | 7,3  | 10,3 | 13,3 | 19,4 |
| GRANADA AEROPUERTO, SP   | 39            | 13,7 | 9,4  | 7,9  | 13,4 | 19,4 | 39          | 6,7  | 4,9  | 3,6  | 6,6  | 10,1 | 39           | 12,5 | 8,9  | 6,7  | 11,3 | 19,6 |
| MELILLA, SP              | 40            | 14,1 | 9,2  | 7,3  | 13,6 | 19,4 | 40          | 10,5 | 4,7  | 6,9  | 10,5 | 14,0 | 40           | 10,9 | 4,3  | 8,0  | 11,0 | 13,7 |
| LLEIDA, SP               | 29            | -2,2 | 3,8  | -4,9 | -2,2 | 0,6  | 29          | 0,4  | 3,3  | -1,5 | 0,3  | 2,7  | 29           | -0,5 | 2,3  | -2,2 | -0,9 | 0,5  |
| PERPIGNAN, FR            | 39            | 6,5  | 68,6 | -6,2 | -4,6 | -2,7 | 39          | 6,1  | 45,4 | -3,7 | -0,4 | 1,7  | 39           | 10,9 | 48,7 | 0,4  | 2,6  | 5,9  |
| MARSEILLES MARIGNANE, FR | 39            | 9,5  | 70,2 | -3,6 | -1,2 | 1,1  | 39          | 15,0 | 42,4 | 4,9  | 8,3  | 11,3 | 39           | 10,8 | 41,3 | 2,5  | 4,4  | 6,3  |
| NICE, FR                 | 36            | 6,9  | 3,8  | 4,2  | 6,3  | 9,4  | 36          | 4,0  | 5,8  | 0,1  | 2,9  | 7,3  | 36           | 19,7 | 9,0  | 13,9 | 19,0 | 24,3 |
| BRINDISI, IT             | 38            | 7,4  | 9,8  | 0,0  | 5,6  | 13,6 | 38          | 5,1  | 8,2  | -2,4 | 5,0  | 13,4 | 38           | 5,3  | 8,1  | -2,5 | 5,0  | 13,5 |
| THESSALONIKI, GR         | 28            | 38,6 | 29,3 | 17,3 | 36,0 | 49,3 | 28          | 26,7 | 22,4 | 8,4  | 21,4 | 38,0 | 28           | 24,5 | 21,8 | 7,2  | 20,6 | 35,9 |
| AVERAGE                  | 9             | 8,2  | 11,4 | 0,6  | 6,5  | 13,3 | 9           | 7,7  | 7,0  | 3,8  | 6,6  | 10,4 | 9            | 10,3 | 7,3  | 4,5  | 10,7 | 15,0 |

**Table S6.** rRMSE and r for anthesis, maturity and yield for the reference period. “Produced by the authors”.

| Anthesis         |                 |          |           |           |          |           |
|------------------|-----------------|----------|-----------|-----------|----------|-----------|
|                  | RMSE            |          |           | r         |          |           |
| STATION          | Agri4Cast       | EOBS-0.1 | EOBS-0.25 | Agri4Cast | EOBS-0.1 | EOBS-0.25 |
| MALAGA,SP        | 2,0             | 8,3      | 12,0      | 0,893     | 0,468    | 0,343     |
| GRANADA,SP       | 20,4            | 9,2      | 20,2      | 0,899     | 0,961    | 0,827     |
| MELILLA,SP       | 5,4             | 3,3      | 2,4       | 0,317     | 0,632    | 0,827     |
| LLEIDA,SP        | 3,9             | 3,6      | 1,4       | 0,821     | 0,977    | 0,979     |
| PERPIGNAN, FR    | 3,5             | 1,0      | 4,2       | 0,986     | 0,996    | 0,974     |
| MARSEILLES, FR   | 2,6             | 8,5      | 3,3       | 0,966     | 0,981    | 0,990     |
| NICE, FR         | 5,0             | 5,5      | 20,2      | 0,975     | 0,961    | 0,831     |
| BRINDISI, IT     | 1,1             | 0,3      | 0,8       | 0,984     | 0,998    | 0,991     |
| THESSALONIKI, GR | 15,2            | 9,1      | 9,2       | 0,898     | 0,933    | 0,922     |
| Maturity         |                 |          |           |           |          |           |
|                  | RMSE            |          |           | r         |          |           |
| STATION          | Agri4Cast       | EOBS-0.1 | EOBS-0.25 | Agri4Cast | EOBS-0.1 | EOBS-0.25 |
| MALAGA, SP       | 3,0             | 11,4     | 16,1      | 0,941     | 0,785    | 0,742     |
| GRANADA, SP      | 18,7            | 8,6      | 18,3      | 0,947     | 0,968    | 0,904     |
| MELILLA,SP       | 9,8             | 6,0      | 3,7       | 0,499     | 0,746    | 0,862     |
| LLEIDA, SP       | 3,3             | 3,5      | 1,6       | 0,821     | 0,982    | 0,988     |
| PERPIGNAN, FR    | 3,4             | 1,0      | 4,8       | 0,993     | 0,997    | 0,978     |
| MARSEILLES, FR   | 2,1             | 8,5      | 4,2       | 0,968     | 0,986    | 0,989     |
| NICE, FR         | 5,4             | 5,2      | 19,1      | 0,969     | 0,982    | 0,921     |
| BRINDISI, IT     | 1,2             | 0,2      | 1,3       | 0,979     | 0,999    | 0,991     |
| THESSALONIKI, GR | 14,1            | 8,9      | 8,5       | 0,844     | 0,925    | 0,921     |
| Harvesting       |                 |          |           |           |          |           |
|                  | (RMSE/mean*100) |          |           | r         |          |           |
| STATION          | Agri4Cast       | EOBS-0.1 | EOBS-0.25 | Agri4Cast | EOBS-0.1 | EOBS-0.25 |
| MALAGA, SP       | 5,0             | 12,1     | 16,4      | 0,846     | 0,734    | 0,655     |
| GRANADA, SP      | 15,9            | 8,0      | 14,7      | 0,292     | 0,791    | 0,397     |
| MELILLA,SP       | 16,3            | 11,2     | 11,5      | 0,557     | 0,833    | 0,857     |
| LLEIDA, SP       | 4,4             | 3,2      | 2,3       | 0,831     | 0,885    | 0,942     |
| PERPIGNAN, FR    | 14,4            | 9,7      | 11,0      | 0,299     | 0,786    | 0,761     |
| MARSEILLES, FR   | 15,6            | 12,8     | 10,1      | 0,168     | 0,833    | 0,857     |
| NICE, FR         | 7,7             | 6,6      | 20,8      | 0,919     | 0,787    | 0,576     |
| BRINDISI, IT     | 11,0            | 9,0      | 9,0       | 0,774     | 0,834    | 0,838     |
| THESSALONIKI, GR | 37,7            | 27,6     | 25,7      | 0,423     | 0,563    | 0,589     |

## Figures

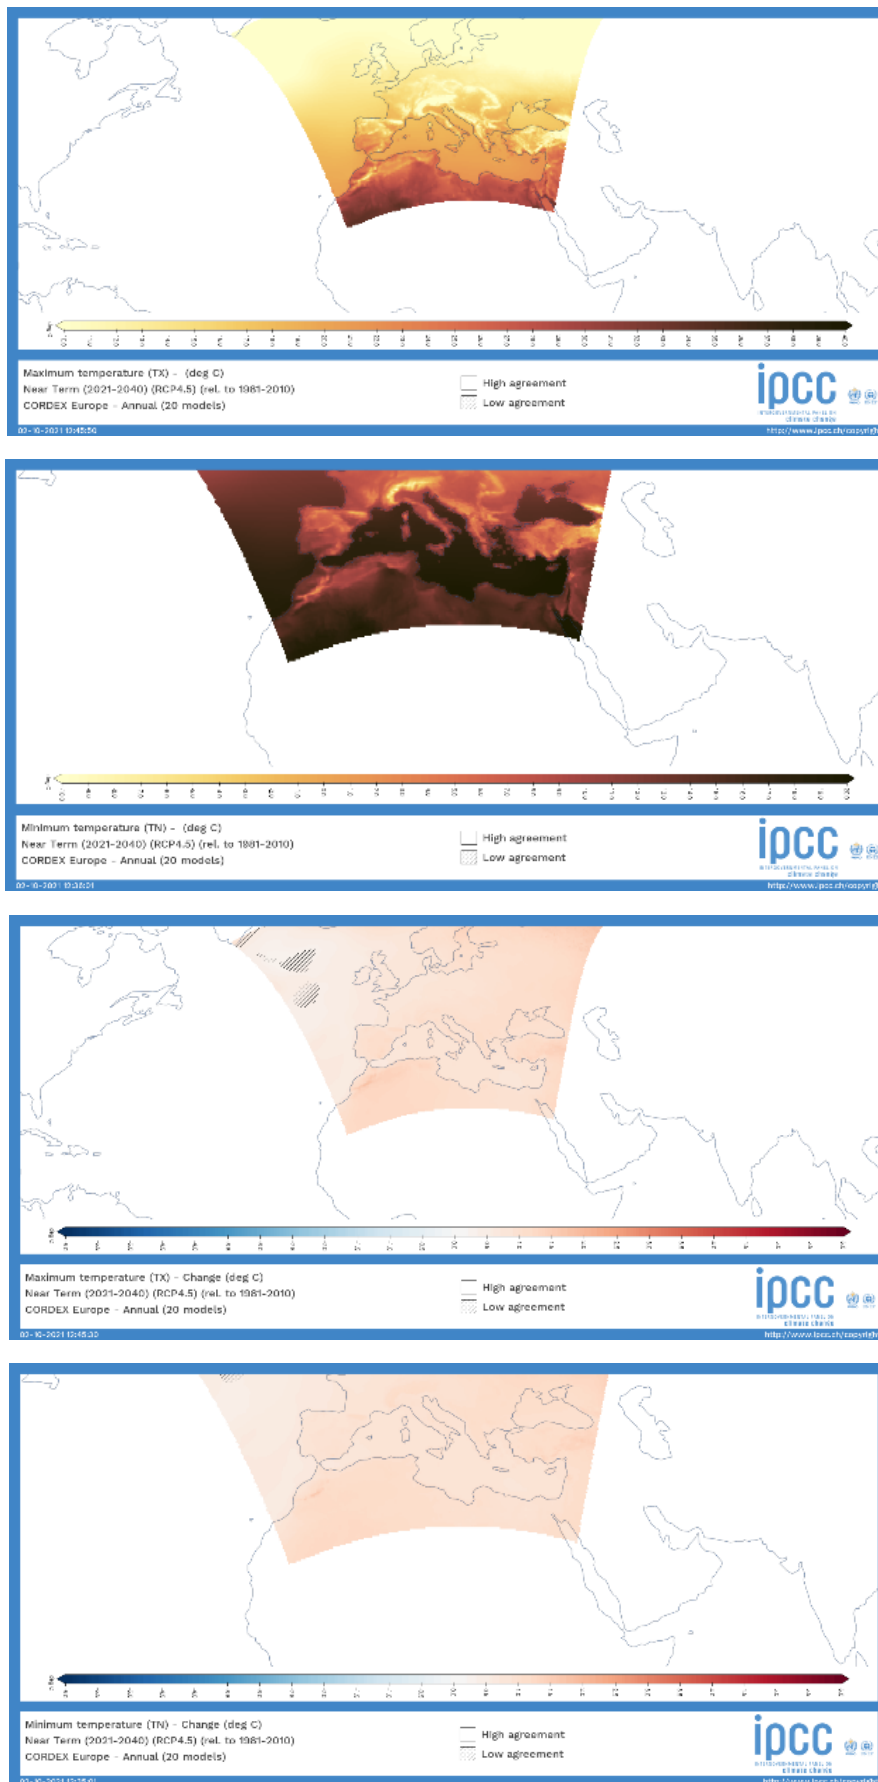

**Figure S1.** Illustrated maps for Tmax and Tmin (1<sup>st</sup> & 2<sup>nd</sup> row) and their variations (3<sup>d</sup> & 4<sup>th</sup> row) for the near future (2021-2040), for RCP 4.5 in continental Mediterranean regions according to IPCC (<https://interactive-atlas.ipcc.ch/>).

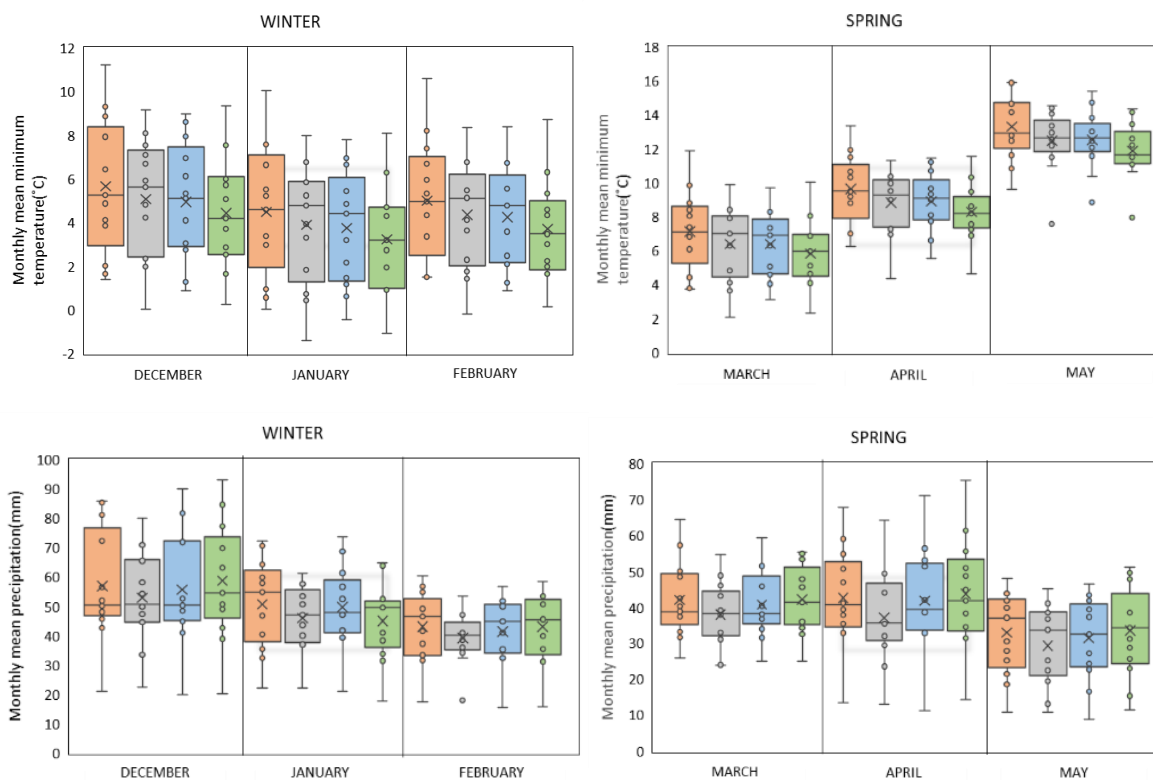

**Figure S2.** Comparison between gridded data and OBS for minimum temperature (13 stations) and Prec (13 stations) (1<sup>st</sup> and 2<sup>nd</sup> row, respectively) for the reference period. “Produced by the authors”.

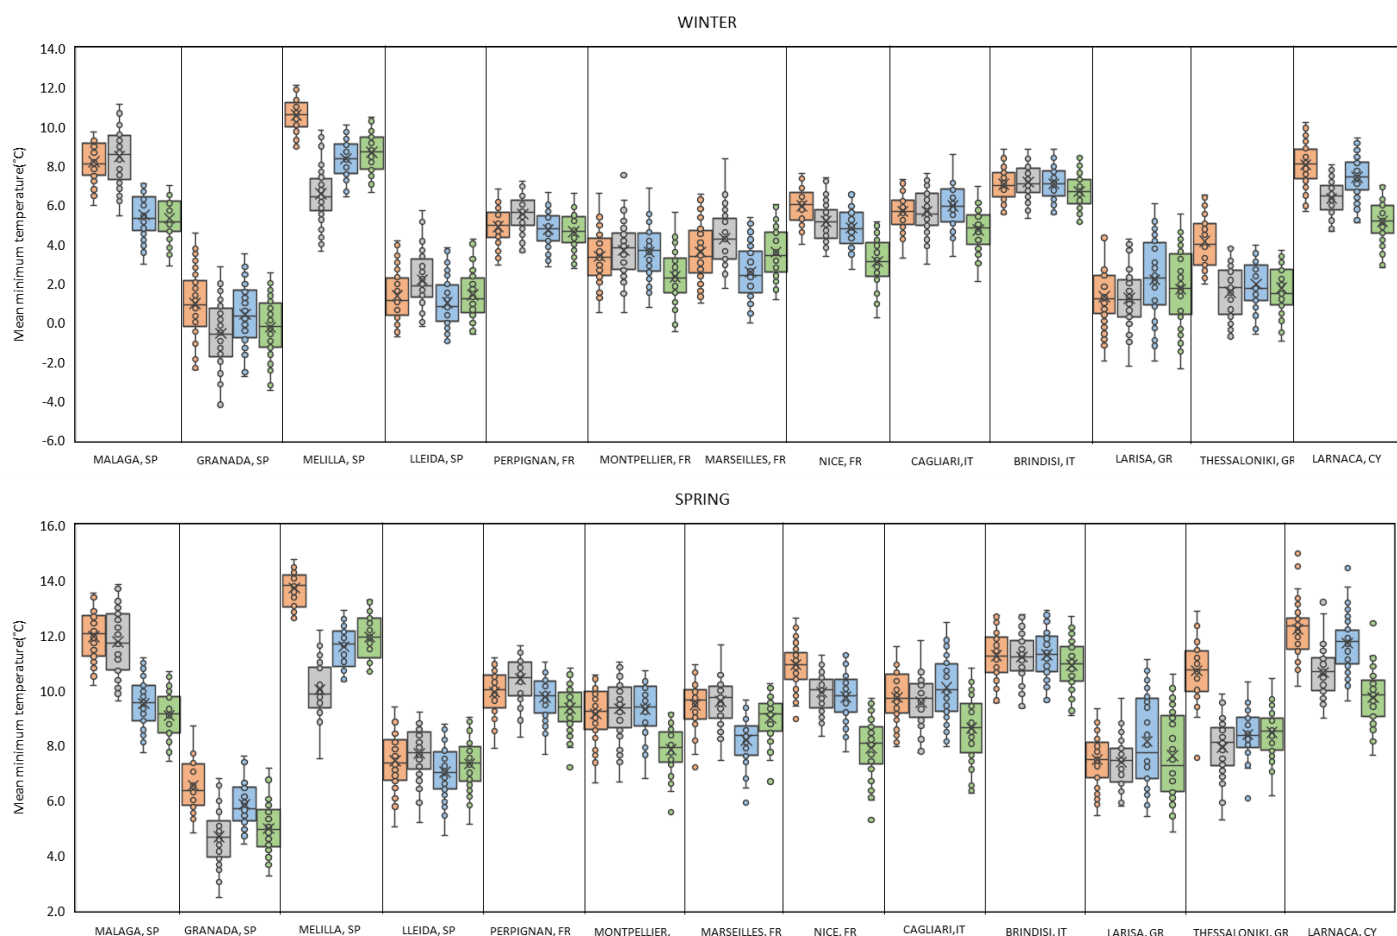

**Figure S3.** Seasonal comparison of Tmin between gridded data and OBS for each season (they were ranked from west to east) and the reference period. “Produced by the authors”.

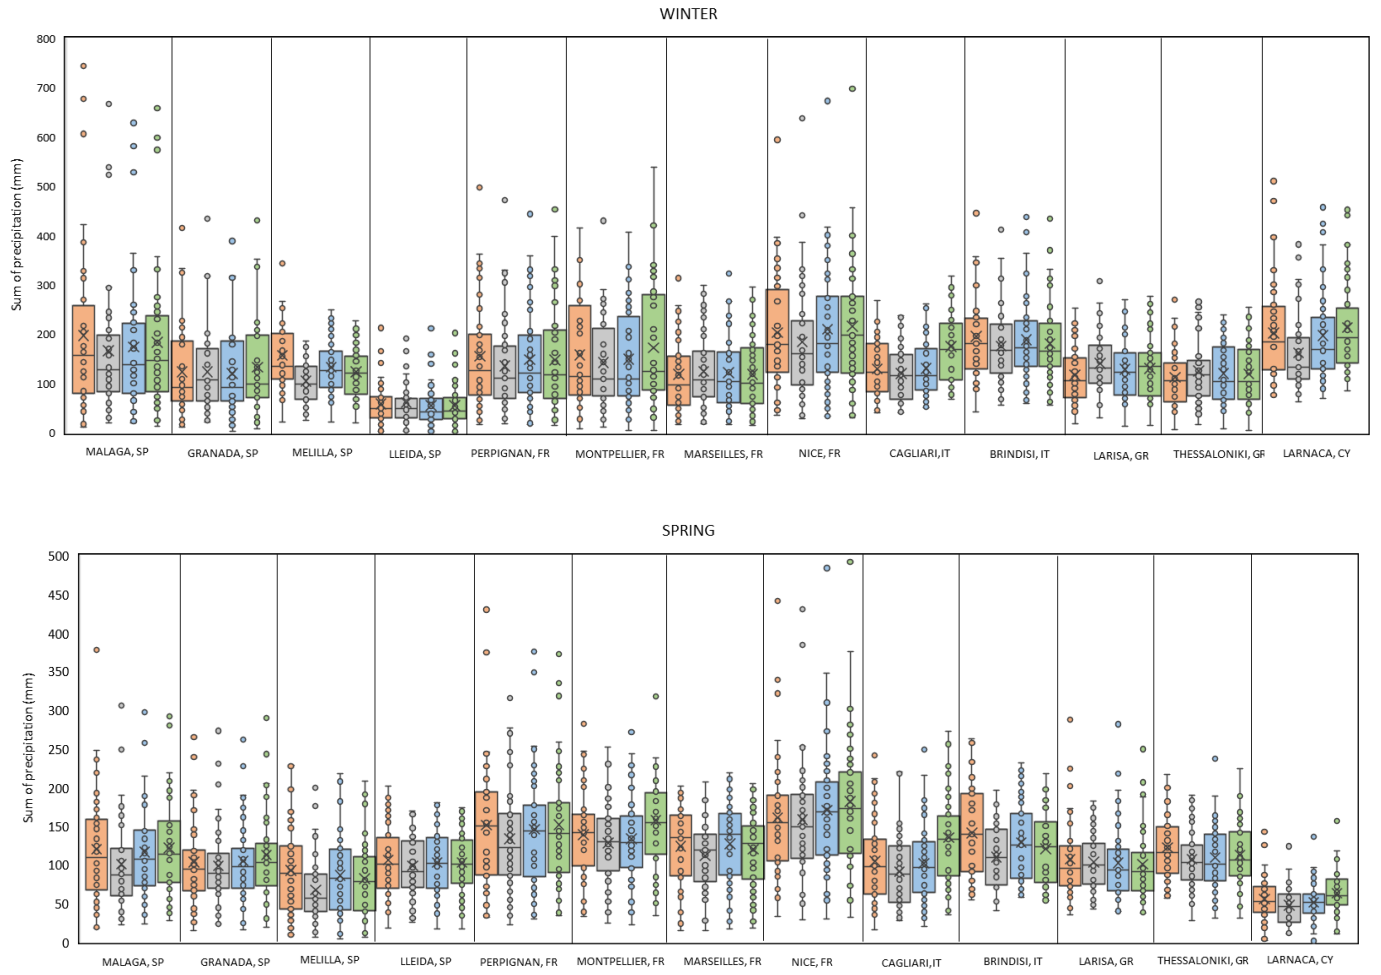

**Figure S4.** Seasonal comparison of Prec between gridded data and OBS for each season (they were ranked from west to east) and the reference period. “Produced by the authors”.

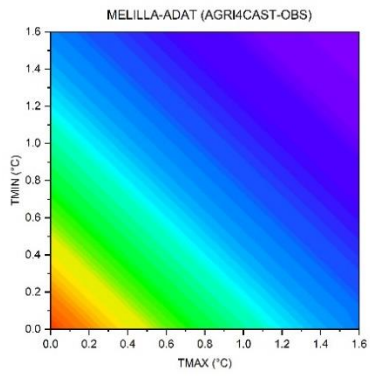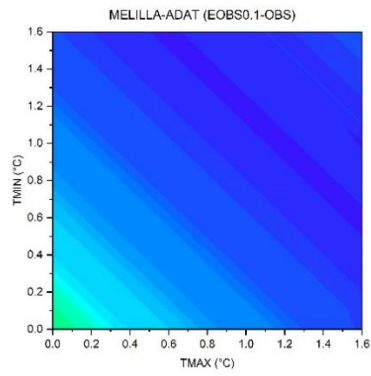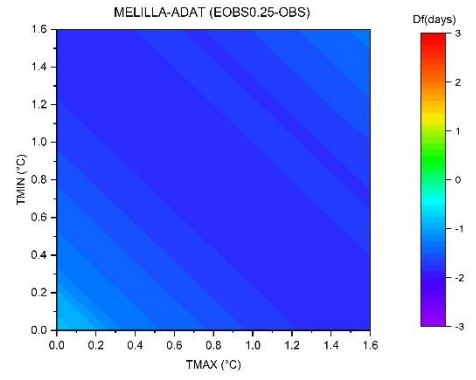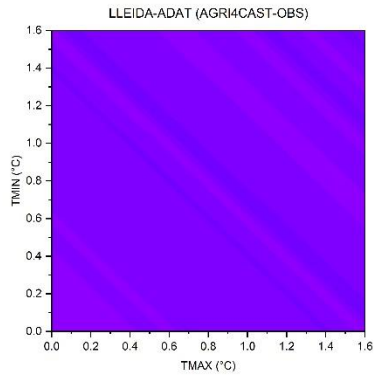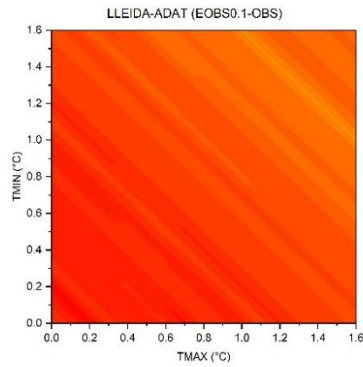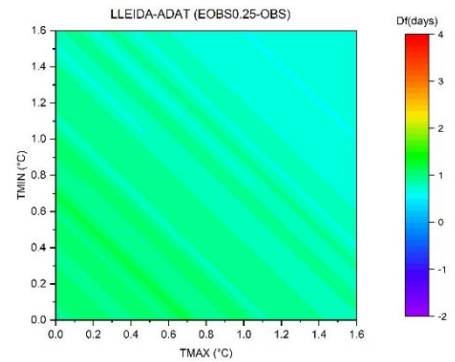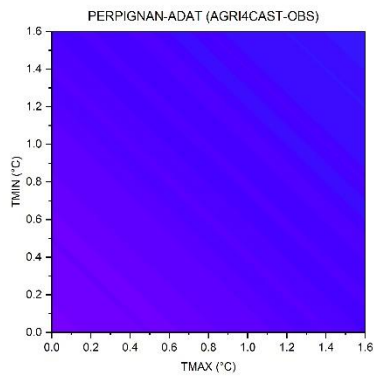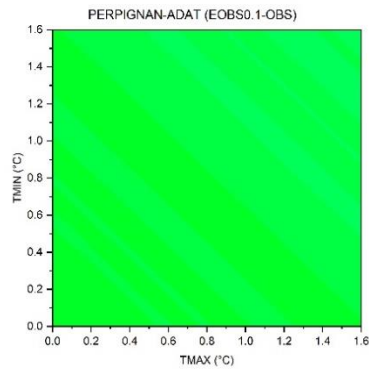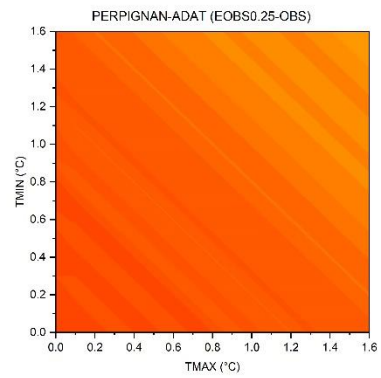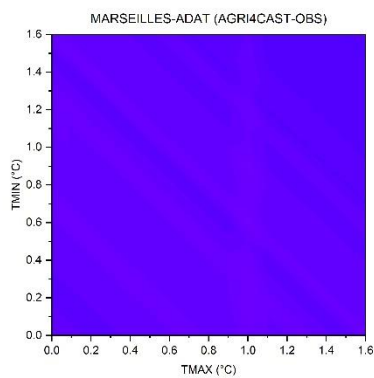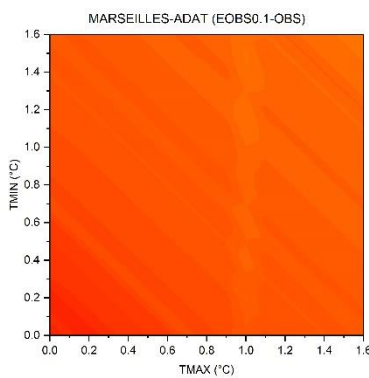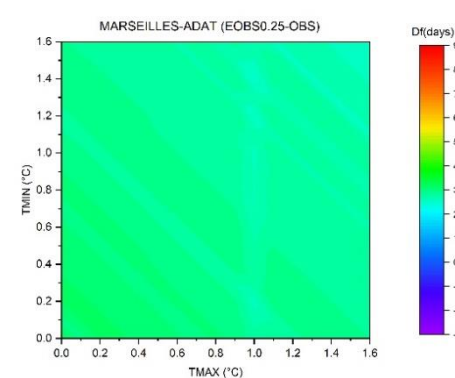

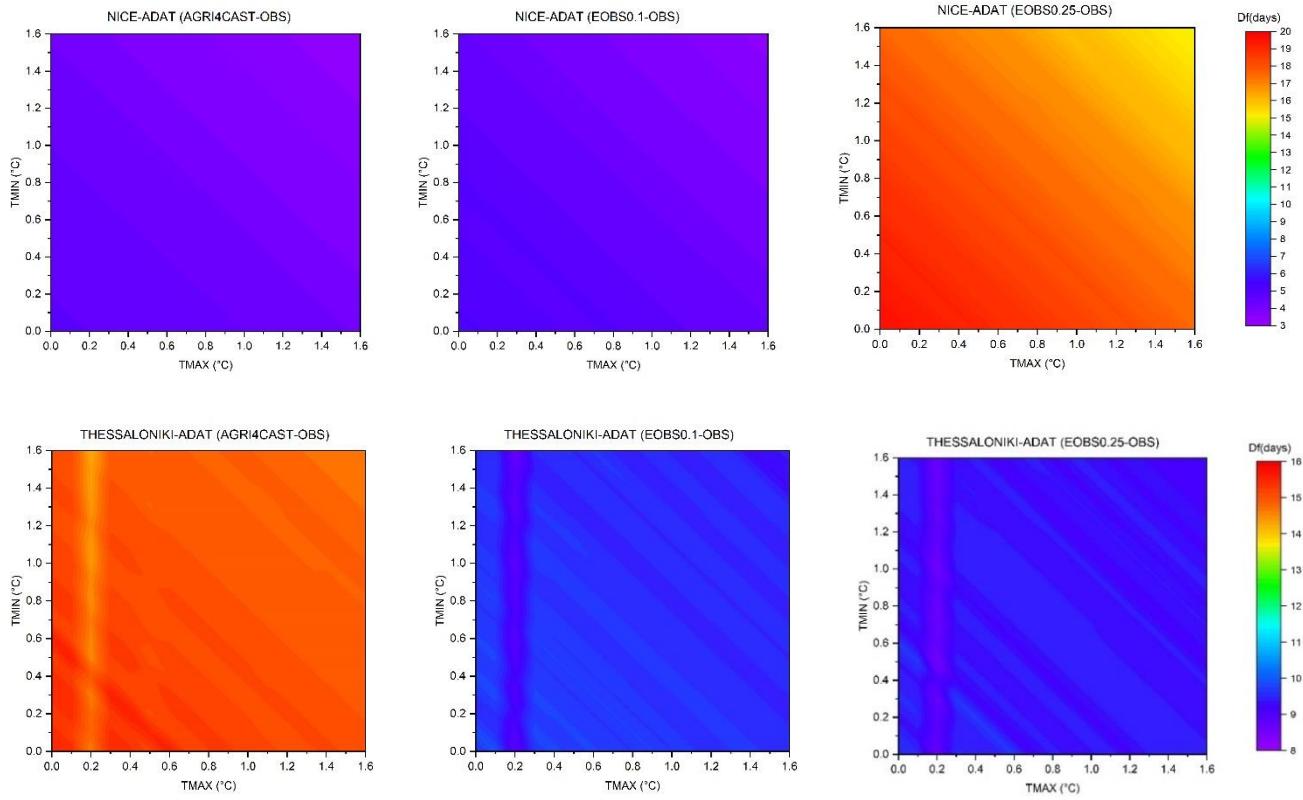

**Figure S5.** Discrepancies between gridded (EOBS-0.1, EOBS-0.25 and Agri4Cast) and measured (OBS) weather data of simulated with CERES-Wheat anthesis (expressed as Gridded –Measured (days)) for Melilla, Lleida, Perpignan, Marseilles, Nice and Thessaloniki to changes in maximum (Tmax) and minimum (Tmin) air temperature. “Produced by the authors”.



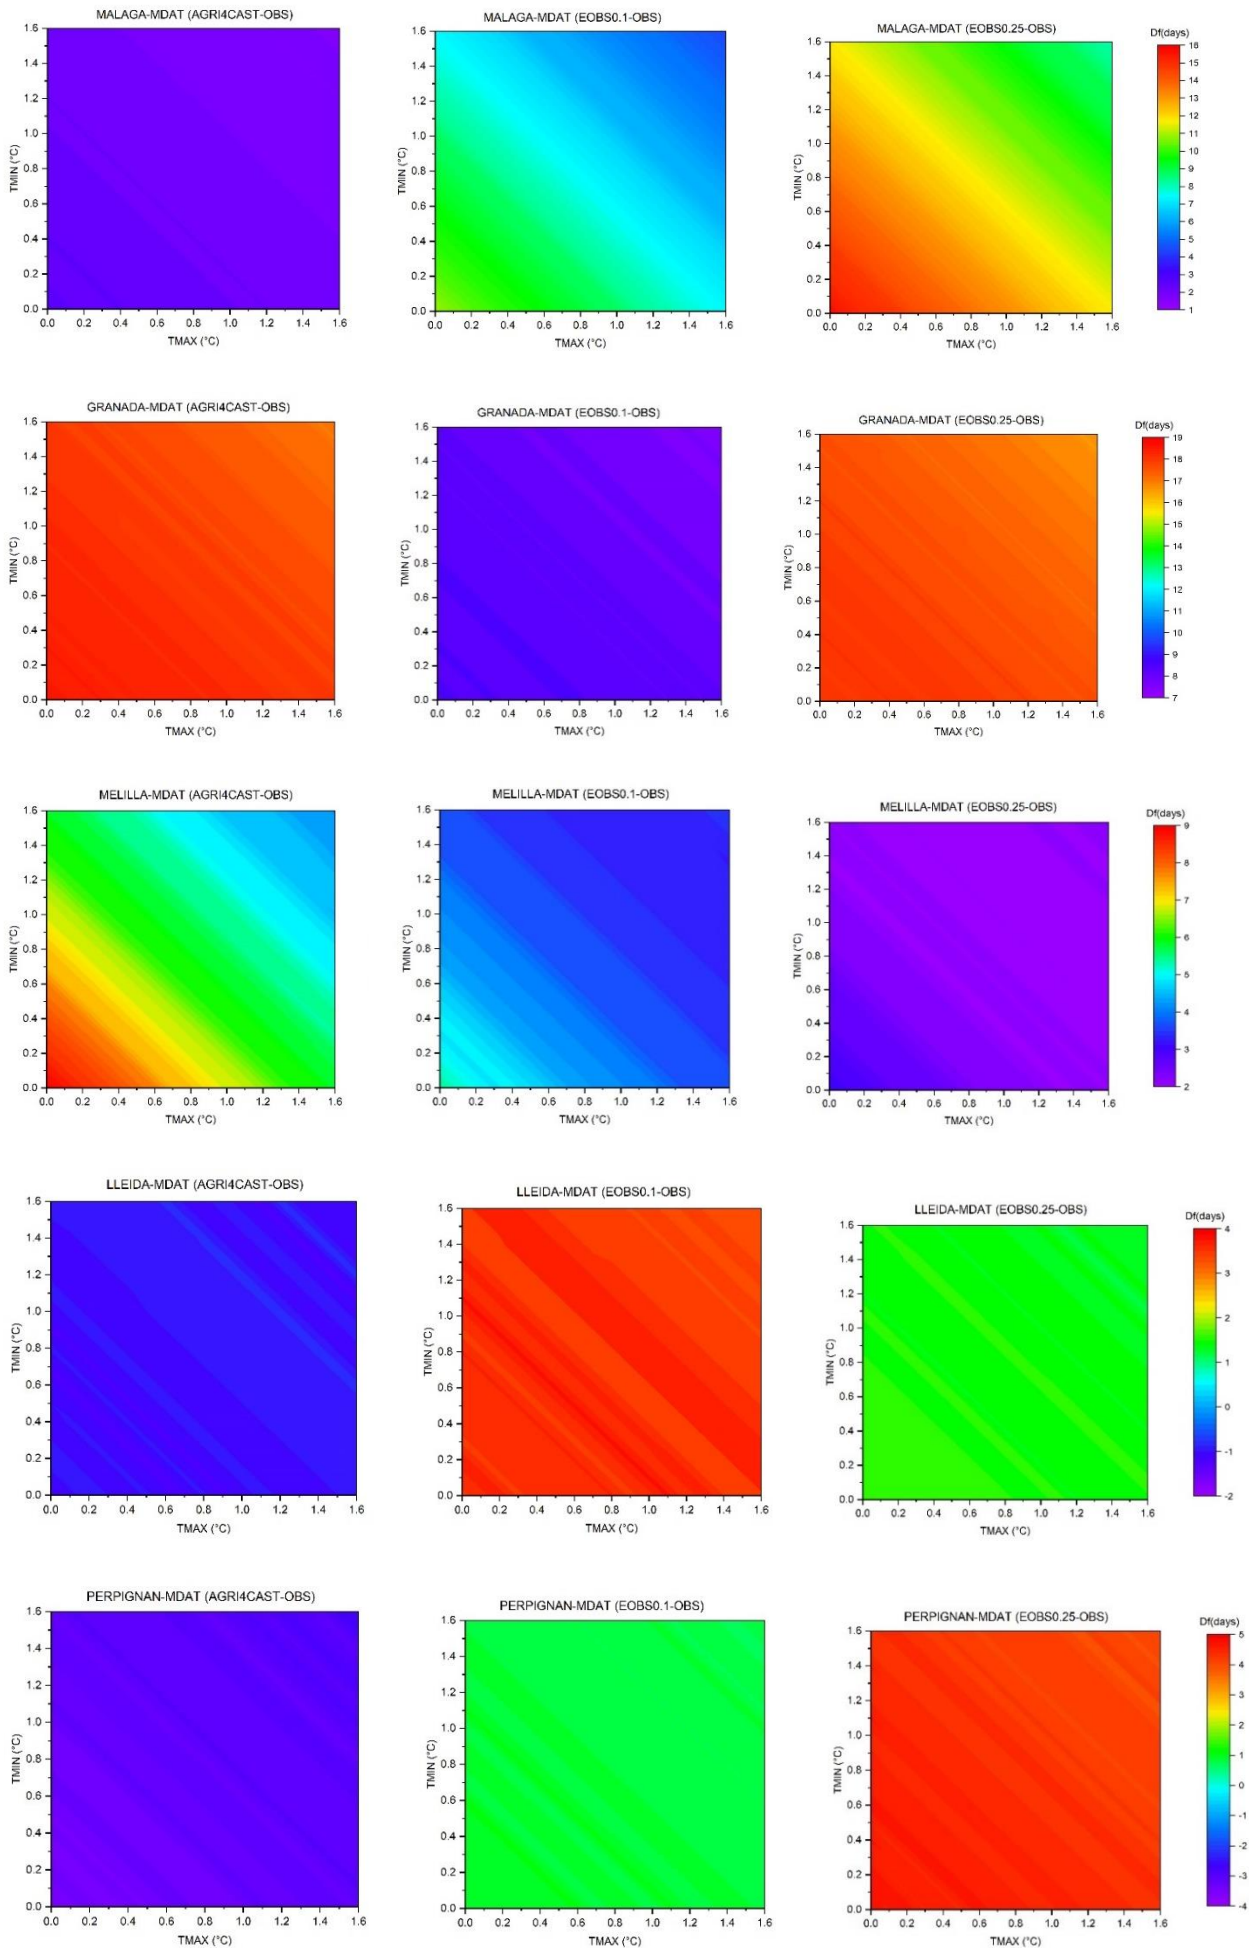

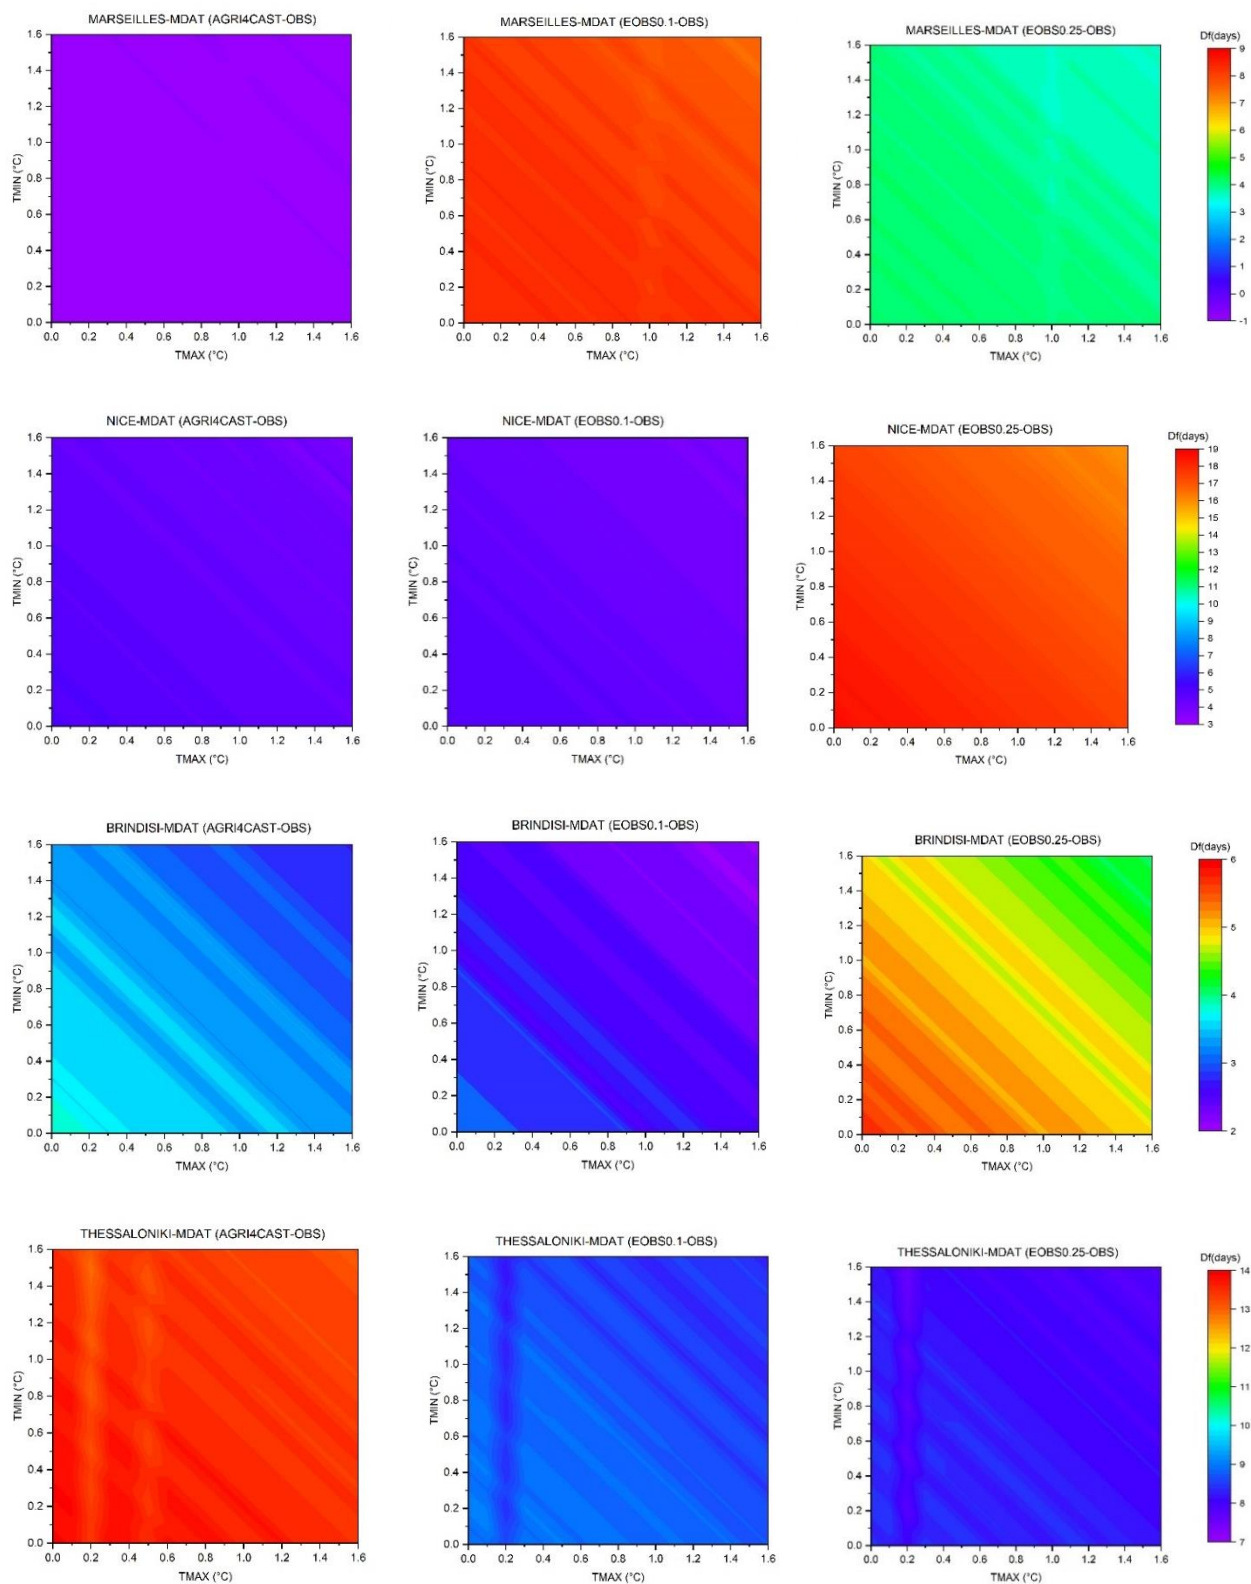

**Figure S6.** Discrepancies between gridded (EOBS-0.1, EOBS-0.25 and Agri4Cast) and measured (OBS) weather data of simulated with CERES-Wheat anthesis (expressed as Gridded - Measured (days)) for each station to changes in maximum (Tmax) and minimum (Tmin) air temperature. “Produced by the authors”.

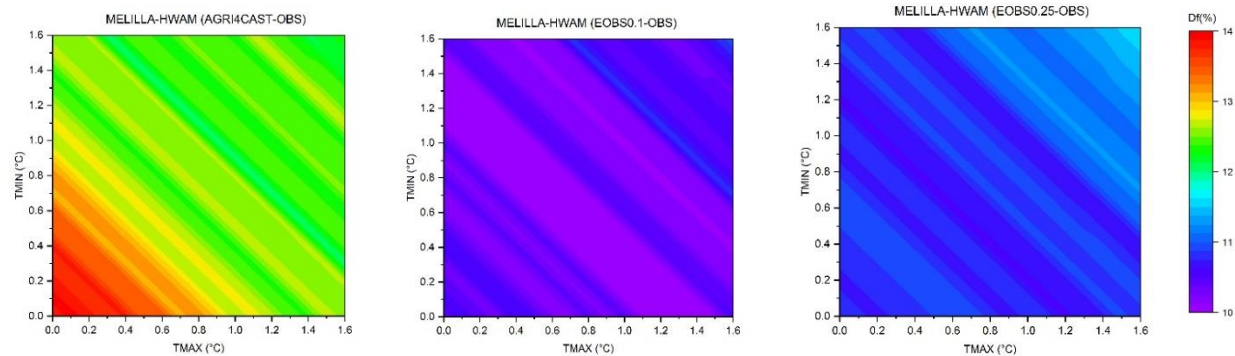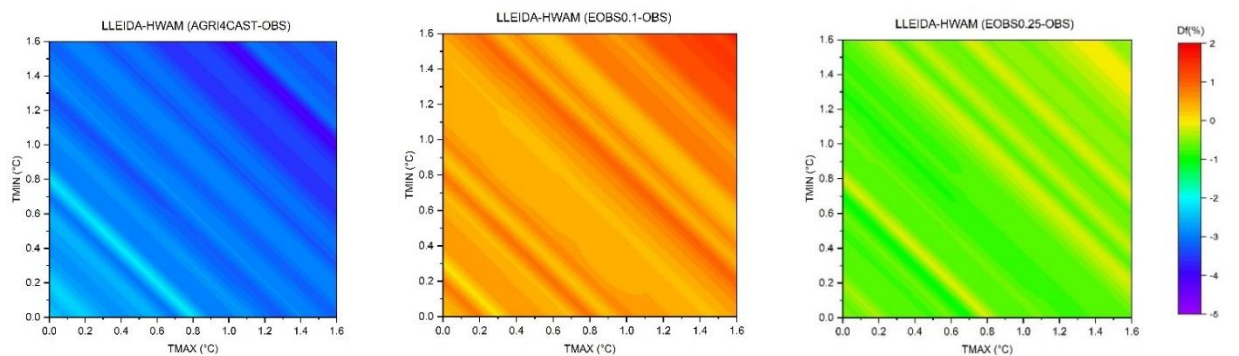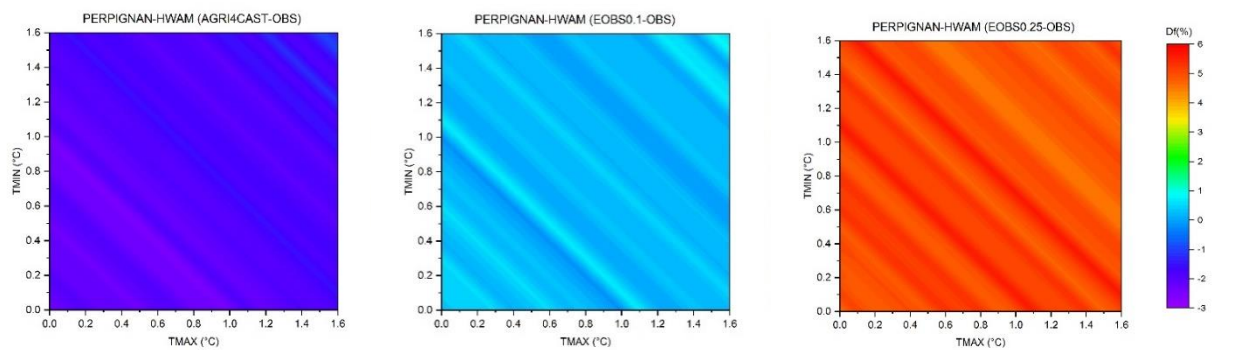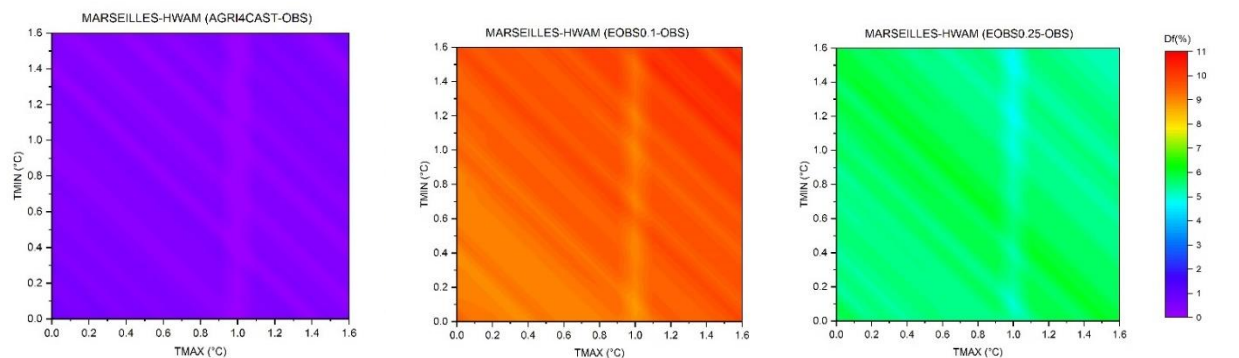



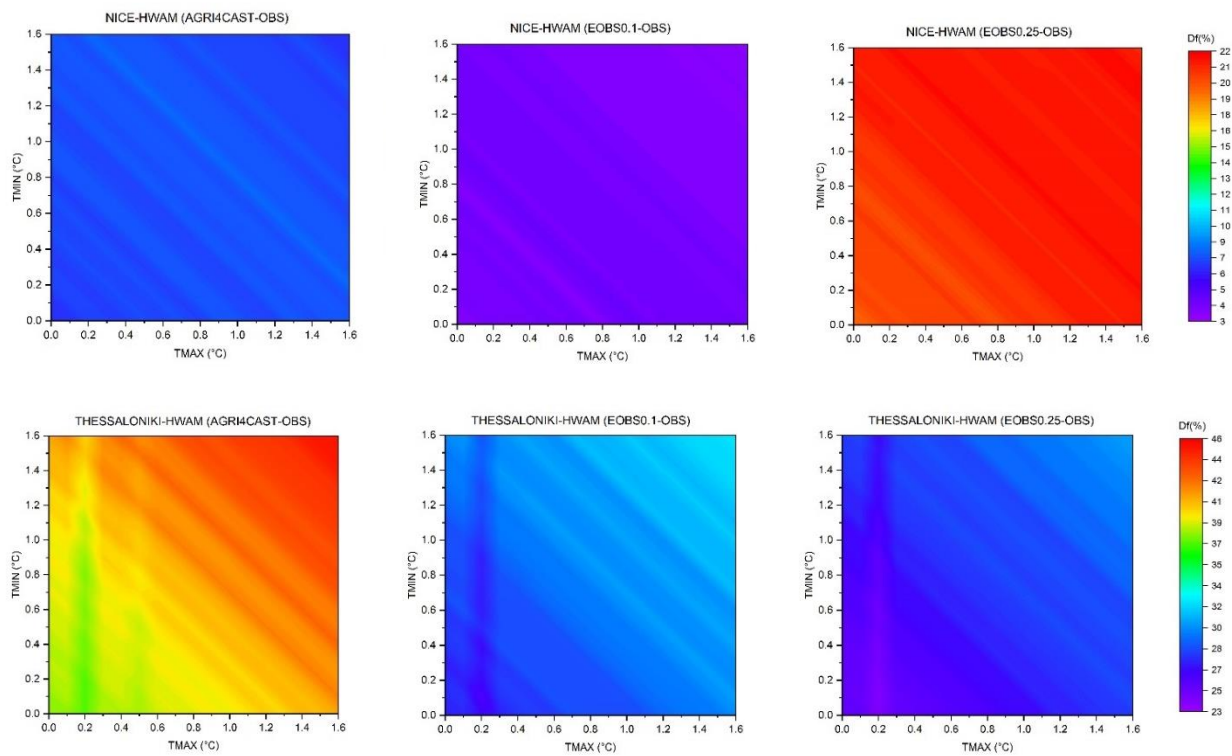

**Figure S7.** As for Figure S5 but for grain yield (expressed as  $(\text{Gridded-Measured})/\text{Measured} \times 100$ ). “Produced by the authors”.
